# Supplementary material
Source: PubMed Central journal article supplement (PMC4873960)
Supplement: NIHMS786282-supplement-Copyright.pdf [file NIHMS786282-supplement-Copyright.pdf]

Lobo J, Zariwala MA, Noone PG. Primary ciliary dyskinesia. *Semin Respir Crit Care Med*. 2015 Apr;36(2):169-79. doi: 10.1055/s-0035-1546748. Epub 2015 Mar 31. Review. PubMed PMID: 25826585.

This serves as the reference to the copyright of the publisher as required by Seminars in Respiratory and Critical Care Medicine for the archived version published online and uploaded to an institutional repository.

The link for the article published online in the e-journals system of the Thieme Publishing Group ([www.thieme-connect.com](http://www.thieme-connect.com)):

[Semin Respir Crit Care Med](http://www.thieme-connect.com). 2015 Apr;36(2):169-79. doi: 10.1055/s-0035-1546748. Epub 2015 Mar 31.
